1 **Oral epithelial cells distinguish between *Candida* species with high or low**  
2 **pathogenic potential through miRNA regulation**

3  
4 Márton Horváth<sup>1</sup>, Gábor Nagy<sup>2</sup>, Nóra Zsindely<sup>1</sup>, László Bodai<sup>2</sup>, Péter Horváth<sup>4,5</sup>, Csaba  
5 Vágvölgyi<sup>1</sup>, Joshua D. Nosanchuk<sup>6</sup>, Renáta Tóth<sup>1,†</sup>, Attila Gácsér<sup>1,3,†,#</sup>

6  
7 <sup>1</sup> Department of Microbiology, University of Szeged, Szeged, Hungary

8  
9 <sup>2</sup> Department of Biochemistry and Molecular Biology, University of Szeged, Szeged,  
10 Hungary

11  
12 <sup>3</sup> MTA-SZTE Lendület Mycobiome Research Group, University of Szeged, Szeged, Hungary

13  
14 <sup>4</sup> Synthetic and Systems Biology Unit, Biological Research Centre (BRC), Szeged, Hungary.

15  
16 <sup>5</sup> Institute for Molecular Medicine Finland, University of Helsinki, Helsinki, Finland

17  
18 <sup>6</sup> Departments of Medicine (Infectious Diseases) and Microbiology and Immunology, Albert  
19 Einstein College of Medicine, Bronx, New York

20  
21 <sup>†</sup> These authors share last authorship.

22  
23 <sup>#</sup> Address correspondence to Attila Gácsér, [gacsera@bio.u-szeged.hu](mailto:gacsera@bio.u-szeged.hu)

24  
25  
26  
27  
28  
29 **Running Head:** Host miRNA responses distinguish between *Candida* species

30  
31 **Major subject areas:** Molecular biology, Microbiology and Infectious Disease, Immunology

32  
33 **Keywords:** *Candida*, oral epithelial cell, host-pathogen interaction, miRNA regulation

34  
35 **Research organism(s):** *Candida albicans*, *Candida parapsilosis*

36  
37 **Impact statement:** Altered miRNA regulation discriminates between *C. albicans* and *C.*  
38 *parapsilosis* in human oral epithelial cells

39  
40

41 **Abstract**

42

43 Oral epithelial cells monitor microbiome composition and initiate immune response upon  
44 dysbiosis, as in case of *Candida* imbalances. Comparison of healthy oral epithelial cell  
45 responses revealed that the inability of *C. parapsilosis* to induce a robust antifungal response  
46 was due to activation of various inflammation-independent pathways, while *C. albicans*  
47 robustly activated inflammation cascades. Regarding posttranscriptional regulation, several  
48 miRNAs were altered by both species. For *C. parapsilosis*, the applied dose directly  
49 correlated with changes in transcriptomic responses. Carbohydrate metabolism, hypoxia- and  
50 cardiovascular development-related responses dominate after *C. parapsilosis* stimulus,  
51 whereas *C. albicans* altered inflammatory responses. Subsequent analyses of HIF1- $\alpha$  and  
52 HSC-activation pathways predicted target genes through which miRNA-dependent regulation  
53 of yeast-specific functions may occur, supporting the observed responses. Thus, *C.*  
54 *parapsilosis* is recognized as a commensal at low doses by the oral epithelium; however,  
55 increased fungal burden activates different pathways, some of which overlap with  
56 inflammatory processes induced by *C. albicans*.

57

58

59

## 60 **Introduction**

61 The barrier function of epithelium is of paramount importance in maintaining homeostasis  
62 and protecting hosts against an array of injuries, including from microbes. Besides providing  
63 physical protection, cells of the epithelium produce and secrete various enzymes (e.g.,  
64 lysozymes), peptides (e.g., defensins), and other small molecules (e.g., free oxygen  
65 radicals) that inhibit or kill diverse microbes (1). Epithelial cells also actively contribute to  
66 innate immune responses (2). Opportunistic pathogenic *Candida* species are members of the  
67 normal human mucosal microflora of the oral cavity, airways, intestinal tract and genitals (3).  
68 These species primarily cause infections in immunosuppressed patients or individuals with  
69 disrupted barrier functions (4). When *Candida* are able to avoid or subvert host responses,  
70 serious and persistent local or systemic infections can arise (collectively also referred to as  
71 candidiasis), which includes life-threatening invasive infections (5). The most common  
72 species associated with systemic invasive candidiasis is *C. albicans*, although the occurrence  
73 of *non-albicans Candida* (NAC) species has risen sharply in recent years, and invasive  
74 infections from NAC species are more frequent than *C. albicans* in many geographical  
75 regions (6)(7).

76 One of the most common forms of candidiasis is oral candidiasis, which is primarily caused  
77 by *C. albicans* followed by *C. glabrata*, *C. parapsilosis*, *C. tropicalis*, and *C.*  
78 *pseudotropicalis* (8). All of these species may be present in the healthy oral mycobiome;  
79 however, their amount and diversity increases upon dysbiosis due to inflammation or cancer  
80 (9)(10). These conditions also significantly increase the risk of developing oral candidiasis.  
81 Recent cohort studies suggest that oral candidiasis occurs in ~ 32% of organ transplant  
82 patients (11), ~ 36% of diabetic patients (12), 55% of patients with radiation-induced  
83 stomatitis (13), and ~3 to 88% of individuals infected with HIV, depending on the  
84 geographical location (14).

85 Interactions between oral epithelial cells (ECs) and *C. albicans* are widely studied. In *C.*  
86 *albicans*, the most important step of the commensal-to-pathogen conversion is the yeast to  
87 hyphae morphology shift. Hypha-associated proteins enable the fungus to acquire trace  
88 elements (e.g. iron) from ECs, attach to host cells and invade through the epithelial barrier via  
89 induced endocytosis or active penetration (15)(16). Once adhered to the host's surface, fungal  
90 cells are recognized mainly by Toll-like receptors and C-type lectin receptors, which activate  
91 various signaling pathways (NF- $\kappa$ B, and MAPK signaling). Epithelial damage also occurs,  
92 due to the secretion of various fungal enzymes or toxins, including Candidalysin (17). As a  
93 result, a shift in the host biphasic-MAPK signaling occurs, which discriminates between the

94 commensal and pathogenic state of *C. albicans* (18). In contrast, relatively little is known  
95 about EC responses to NAC species, such as *C. parapsilosis*. This is important as the  
96 pathobiology of these two species are extremely different. For example, *C. albicans* elicits an  
97 almost immediate and vigorous proinflammatory host responses, while the response evoked  
98 by *C. parapsilosis* is mild and delayed (19). The milieu of the colonization site also seems to  
99 greatly influence the host response towards these species given the previous findings that (i)  
100 in contrast with *C. albicans*, *C. parapsilosis* is a common natural commensal of the human  
101 skin (20,21), and (ii) *C. parapsilosis* infrequently causes oral candidiasis (22,23) One possible  
102 explanation for the markedly different host responses may be due to differences in  
103 posttranscriptional regulatory processes. microRNAs (miRNAs) are important players in fine-  
104 tuning the expression of genetic information. Recent studies demonstrate several pathogen  
105 associated molecular pattern (PAMP)-inducible miRNAs as well as miRNAs activated by  
106 TLR signaling, such as miR-155, miR-132, miR-125b or miR-146a (24), that exhibited  
107 altered expression upon bacterial or viral induction (25). Despite their confirmed relevance in  
108 host-pathogen interactions, only a few studies have analyzed miRNA profiles of host cells  
109 following *C. albicans* exposure. According to these investigations, miR-146 expression was  
110 significantly increased following  $\beta$ -glucan (a cell wall component of *C. albicans* cells)  
111 treatment in THP-1 cells, which resulted in the inhibition of the proinflammatory response  
112 (26). Heat-killed *C. albicans* were found to increase expression of 5 miRNAs in macrophages,  
113 including miR-155 and miR-146a, and the changes were induced by the activation of NF- $\kappa$ B  
114 signaling (27). In terms of epithelial barriers, the presence of *Candida*-reactive miRNAs has  
115 also been reported in airway ECs where several miRNA species associated with, for example,  
116 cell division, apoptosis or differentiation processes, were identified (28).

117 In this study, we aimed to investigate how healthy oral ECs discriminate between *C. albicans*  
118 and *C. parapsilosis*, and to dissect the potential underlying discriminatory mechanisms of the  
119 detected host responses. We further sought to examine whether species-specific  
120 posttranscriptional regulatory processes controlled the phenomenon by performing in-depth *in*  
121 *silico* analyses of both transcriptomic and miRNA sequencing data.

122

123

124 **Results**

125 **Robust antifungal humoral response is triggered by *C. albicans*, but not *C. parapsilosis***  
126 **in oral epithelial cells**

127 In contrast with other innate immune cells, direct cellular responses, such as pathogen  
128 internalization and subsequent killing, are not a major function of ECs. This was reflected by  
129 the extremely low interaction events between *Candida* and ECs when examining direct cell-  
130 cell interactions, which were too few to allow the authentic interpretation of data (data not  
131 shown). Rather, the function of ECs manifests in the activation of professional phagocytic  
132 cells through the secretion of chemokines, cytokines or other signaling molecules. Additional  
133 responses include the secretion of antimicrobial peptides, such as beta-defensins, another  
134 route to effectively combat invading pathogens (29,30). To investigate the nature of healthy  
135 oral epithelial humoral responses to *C. albicans* and *C. parapsilosis*, OKF6/TERT2 cells were  
136 used. We first examined the host cell damaging capacity of both yeast species (FIG 1/A). For  
137 subsequent analyses, infection doses were selected that did not exceed 25% of host cell  
138 damage. For *C. albicans*, the multiplicity of infection (MOI) of 1:1 met this criterion ( $22.09$   
139  $\pm 3.23\%$ ), while none of the applied *C. parapsilosis* doses resulted in a more than 10% of host  
140 cell loss. Therefore, we selected the highest infection dose, which is in accordance with the  
141 literature (31–33). Next, we investigated the expression of proinflammatory (TNF- $\alpha$ , IL-1 $\alpha/\beta$ ,  
142 and IL-6) and immunoregulatory (GM-CSF) cytokines, chemokines (IL-8, ccl2, ccl20) and an  
143 antimicrobial peptide (human  $\beta$ -defensin 2, or hBD-2). Remarkably, *C. albicans* elevated the  
144 expression of all examined chemokines and cytokines (from 7 to 840 times higher expression)  
145 relative to the untreated control (FIG 1/B). Co-culture with *C. parapsilosis* also resulted in  
146 statistically significant differences in cytokine/chemokine responses; however, compared to  
147 the exuberant immune response evoked by *C. albicans*, these changes were modest (FIG 1/B).  
148 For *C. parapsilosis*, these included IL-1 $\alpha$  ( $2.21 \pm 0.65$ ,  $p=0.097$ ), IL-1 $\beta$  ( $1.65 \pm 0.11$ ,  $p<0.01$ ),  
149 ccl2 ( $0.52 \pm 0.1$ ,  $p<0.01$ ) and CSF2 ( $3.12 \pm 0.53$ ,  $p<0.05$ ), relative to the untreated sample's  
150 normalized value of 1. Although not significant, the expression of hBD-2 increased in the  
151 presence of *C. albicans* only (FIG 1/C). Hence, we found marked differences in the immune  
152 response triggered by the two *Candida* species. Next, we aimed to examine whether these  
153 distinctive responses were due to alterations in regulatory processes during stimulation with  
154 these fungi.

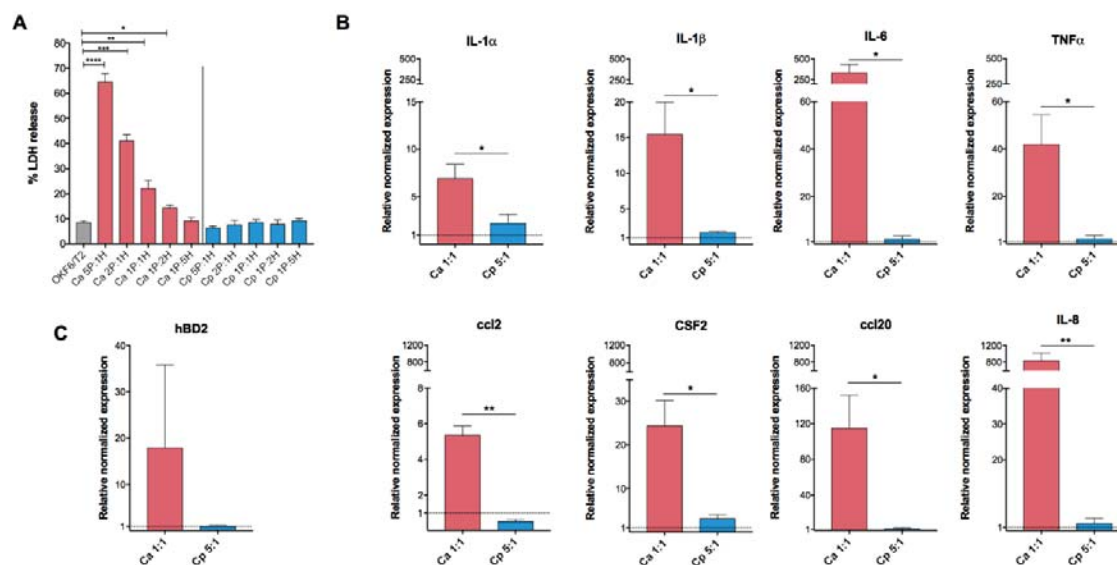

155

156 **FIG 1 - Epithelial response activation by *C. albicans* and *C. parapsilosis*.** OKFT6/TERT2 cells were cultured  
 157 with *C. albicans* or *C. parapsilosis* in different infection ratios to investigate their host cell damaging capacity  
 158 and EC responses after 6 hours of coinubation. (A) Host cell damage was assessed by lactate dehydrogenase  
 159 (LDH) measurement. Relative normalized expression of cytokine and chemokine encoding genes (B) and the  
 160 human beta defensin 2 (hBD2) encoding gene (C) were determined by qPCR. The depicted significance defines  
 161 the differences between the two fungal treatments. Data were normalized to the uninfected control values (set at  
 162 equal to 1). Data were obtained from three independent experiments (n=3), and analyzed by unpaired t-tests. (\*,  
 163  $p < 0.05$ ; \*\*,  $p < 0.01$ ; \*\*\*,  $p < 0.001$ ; \*\*\*\*,  $p < 0.0001$ )

164

### 165 Species-specific host gene- and miRNA expression profiles detected towards *C.* 166 *parapsilosis* and *C. albicans*

167 Transcriptome and miRNA profile analyses were performed to further examine the distinctive  
 168 responses of the ECs to the two yeast species. To obtain analysis-ready count data from the  
 169 raw sequencing result files, we followed the pipeline detailed in FIG 2/A. In addition to the  
 170 abovementioned doses for the two species (MOI 1:1 for *C. albicans*, and 5:1 for *C.*  
 171 *parapsilosis*), we also applied the dose 1:1 for *C. parapsilosis* for the subcellular analyses in  
 172 order to have an equivalent ratio of host-pathogen for comparisons. Transcripts were analyzed  
 173 both after an early (1h) and a later (6h) time point of fungal exposure to further examine both  
 174 inflammatory, as well as potentially activated non-inflammation-related EC responses. These  
 175 data were compared to that of the uninfected controls. Our results indicate that the majority of  
 176 host cell responses to both species occurred 6 hours after the start of the co-culture, rather  
 177 than shortly following the initial interactions (FIG 2/B). When comparing the MOI 1:1  
 178 infection doses of both species at 1 hour of co-culture, 50 differently expressed genes (DEGs)

179 were identified with 46 (20 down-, 26 upregulated) occurring in *C. albicans* and 4 (all  
180 downregulated) in *C. parapsilosis* treated cells. At the 6 hour time point, 648 DEGs (348  
181 down-, 259 upregulated) were identified in the setting of ECs with *C. albicans* and 79 (23  
182 down-, and 56 upregulated) with *C. parapsilosis*. Thus, at both time points, *C. parapsilosis*  
183 treatment effected the expression of a significantly lower number of genes at the MOI of 1:1.  
184 Once the fungal load was increased however (MOI 5:1), significantly more DEGs were  
185 identified at both times (83 DEGs at 1 hour: 23 down-, 60 upregulated; and 262 DEGs at 6  
186 hours: 55 down-, 207 upregulated), which exceeded the number of DEGs identified after *C.*  
187 *albicans* stimulus at 1 hour. During the transcriptome analysis, we identified genes with  
188 species-specific expression, and identical genes with similar or opposite expression patterns  
189 when comparing *C. albicans* and both ratios of *C. parapsilosis* (FIG 2/B). The identified  
190 DEGs under the different conditions are listed in Table S2.  
191 Next, we examined the ECs' miRNA profile. miRNA analysis results revealed several  
192 miRNAs that were specifically expressed not only in the presence of the two species but also  
193 specific to the applied doses of *C. parapsilosis*. We identified 2, 2 and 3 mature miRNA  
194 transcripts at 1 hour and 2, 8 and 16 at 6 hours of *C. parapsilosis* MOI 1:1, MOI 5:1 and *C.*  
195 *albicans* MOI 1:1 stimulus, respectively (FIG 2/C). While the majority of miRNAs showed a  
196 condition-specific altered expression, miR-4464-3p showed a significantly increased  
197 expression at 1 and 6 hours of *C. albicans* treatment compared to the untreated control. Of the  
198 differentially expressed miRNAs, 1, 2 and 2 target mRNAs were found at 1 hour, while 12, 56  
199 and 185 target mRNAs were identified at 6 hours of *C. parapsilosis* MOI 1:1, MOI 5:1 and *C.*  
200 *albicans* MOI 1:1 stimulus, respectively (Table S3-5). These results suggest that species-, and  
201 in case of *C. parapsilosis*, dose-specific posttranscriptional regulatory mechanisms regulate  
202 host responses under the applied conditions, which could explain the altered transcriptomic  
203 responses.

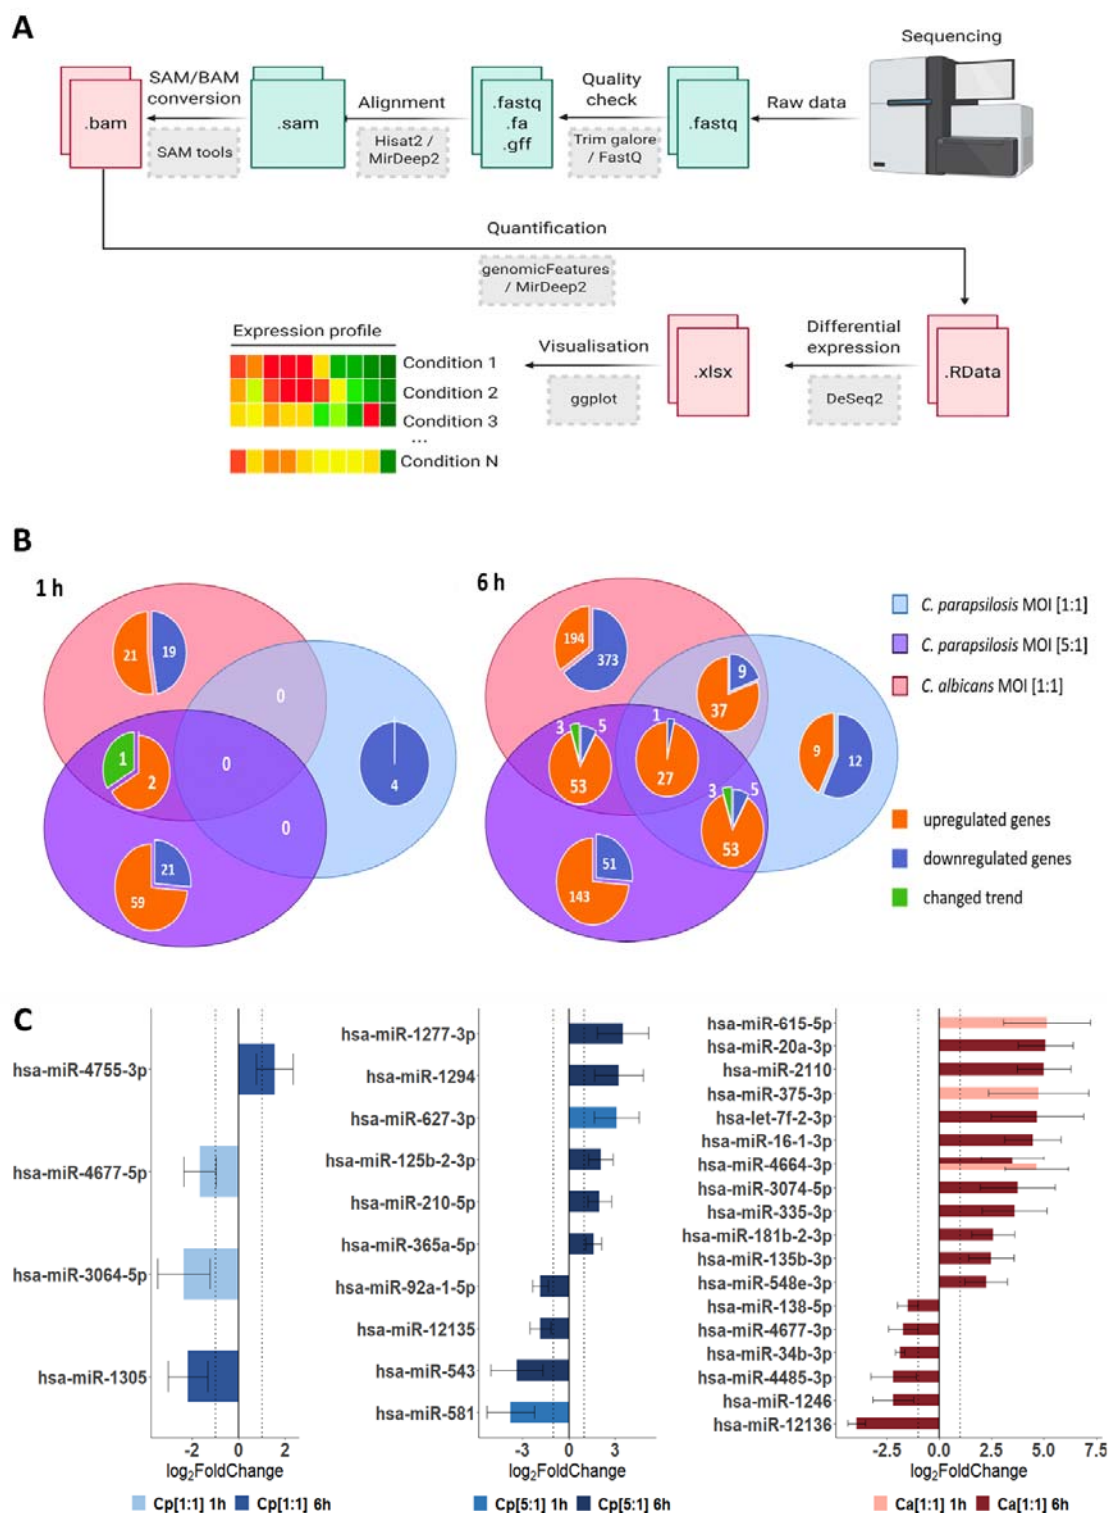

204

205

**FIG 2 - Differentially expressed genes (DEGs) and dysregulated miRNAs in host responses following**

206

**fungal stimuli.** Host transcriptomic and miRNA responses were examined with NGS sequencing methods

207

(Illumina). (A) Workflow of raw data analysis, where the obtained sequences were processed alongside the

208

above detailed bioinformatical pipeline via command line (perl- and java-based) bioinformatical tools (grey



209 boxes), through the listed intermediate files (green/red boxes). (B) Venn-diagrams of host genes identified at 1  
210 and 6 hours under each applied condition. Numbers of condition specific genes as well as genes regulated by  
211 multiple conditions are shown. The term 'changed trend' (green) refers to genes regulated by more than one  
212 condition, but the fold change was positive under at least one condition and negative in another. (C) Differently  
213 expressed host miRNA profiles after the applied conditions.

214

215 **Carbohydrate metabolism-, hypoxia- and cardiovascular development-related responses**  
216 **dominate after *C. parapsilosis* stimulus, while *C. albicans* predominantly induces**  
217 **inflammation responses**

218 Next, we aimed to categorize the identified transcripts and characterize host responses based  
219 on the activated host signaling pathways. We employed different GSEA and ORA methods  
220 (FIG 3/A) to examine the modified canonical pathways (KEGG's pathway analysis, Figure  
221 3/B) and biological functions based on gene ontologies (GO term analysis, FIG 3/C). At 1  
222 hour after fungal exposure, the responses detected did not allow for a more in-depth analysis.  
223 Therefore, we focused on the 6-hour data set. With *C. albicans* treated ECs, both biological  
224 pathways and functions were clearly dominated by inflammatory responses as shown by the  
225 ten most activated pathways and functions in FIG 3/B-C. Some of the most significantly  
226 regulated pathways were the cytokine-cytokine receptor interaction, tumor-necrosis factor  
227 (TNF) signaling, and IL-17 signaling pathways, while activated biological functions included  
228 inflammatory responses, responses to bacteria, to molecules of bacterial origin (e.g. LPS) and  
229 to chemokines (Table S6-7). In contrast, *C. parapsilosis* 1:1 infection resulted in the  
230 activation of routes involved in cardiovascular development and, interestingly, pathways  
231 frequently associated with carcinogenesis (e.g. Rap1 and Ras signaling pathways, HIF1 and  
232 VEGF signaling pathways). The affected biological pathways dominantly clustered around  
233 cardiovascular development (e.g. vasculature development or angiogenesis) (Table S8-9).  
234 Similar pathways were also activated by the *C. parapsilosis* MOI 5:1 co-culture, although  
235 these were also complemented with activations of carbohydrate metabolic pathways (e.g.  
236 starch and glucose metabolism pathways) and hypoxia-related response routes (e.g. HIF1- $\alpha$   
237 signaling pathway). Co-culture of ECs with *C. parapsilosis* at MOI 5:1 also induced the  
238 activation of a few inflammation-related pathways (e.g. cytokine-cytokine-R interaction  
239 pathway) (Table S10-11). Thus, while *C. albicans* triggered multiple inflammation pathways,  
240 *C. parapsilosis* evoked a variety of mainly inflammation-independent host responses that  
241 have not been previously associated with this species.

242

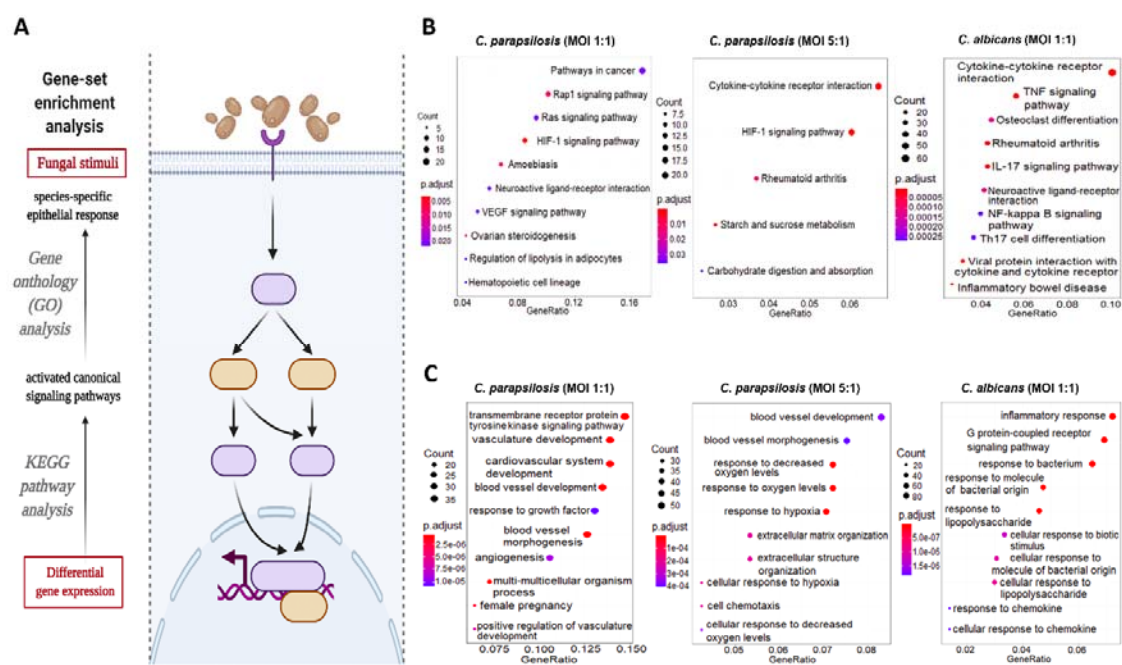

243

244 **FIG 3 - Results of the KEGG pathways and GO term analyses.** (A) The ‘enrichKEGG’ and ‘enrichGO’  
 245 functions (provided within the R-package – DOSE) – and ‘CNA’, and ‘URA’ analyses (provided within  
 246 Ingenuity Pathway Analyses methods) were used to analyze the significantly up/downregulated pathways,  
 247 functions, and upstream regulatory networks, respectively. (B-C) – List of the 10 most activated pathways and  
 248 functions after each stimuli (B). The KEGG results were labelled with their respective interest-to-background  
 249 ratio (x-axis on the figures) within the pathways, their significance (color-coding) and with a corresponding  
 250 ‘count’, which refers to the number of DEGs within a specific pathway. 10 (or less) significant pathways with  
 251 the biggest ‘Gene Ratio’ were visualized as dotplots via the ‘enrichplot’ package. (C) The GO term results were  
 252 visualized similarly for all the applied conditions.

253

254

## 255 **Potential effects of species-specific miRNA responses on host cell function**

256 To examine whether the identified miRNAs could affect the evoked transcriptomic responses,  
257 we first overlapped the targets of the obtained miRNAs and the corresponding altered  
258 transcriptomic profiles in each condition. Then, using cluster analyses of GO  
259 overrepresentation tests, we analyzed functions that the potential target mRNAs (or the target  
260 genes of all identified miRNAs per condition) could affect under each condition. As the early  
261 transcriptional responses under all conditions and the later transcriptional responses after *C.*  
262 *parapsilosis* MOI 1:1 treatment were only mild, none of the predicted functions passed the set  
263 p value threshold. Thus, only the differentially expressed target mRNAs derived from *C.*  
264 *parapsilosis* MOI 5:1 and *C. albicans* MOI 1:1 stimuli were analyzed (FIG 4/A-B).  
265 According to the GO term analyses, the top 5 target mRNA functions of target mRNA  
266 functions after *C. albicans* challenge were ‘response to bacteria’, ‘regulation of metabolic  
267 processes’, ‘negative regulation of cell proliferation’, ‘response to hypoxia’ and ‘multicellular  
268 processes’ (p<0.0001) (FIG 4/A, Table S12). These were clustered in the following  
269 categories: ‘response to stimulus’, ‘metabolic processes’, ‘cellular processes’ and  
270 ‘developmental processes’, respectively. With *C. parapsilosis* co-culture, ‘response to  
271 hypoxia’, ‘positive regulation of chemotaxis’, ‘vascular processes’, ‘positive regulation of  
272 migration’ and monosaccharide metabolic processes’ were listed as the most significantly  
273 enriched functions (p<0.0001), within the major identified clusters of ‘response to stimulus’,  
274 ‘cell motility, ‘developmental processes’, and ‘metabolic processes’ (FIG 4/B, Table S13).  
275 These data suggest that the identified miRNAs could actively regulate the identified species-  
276 specific transcriptomic responses.

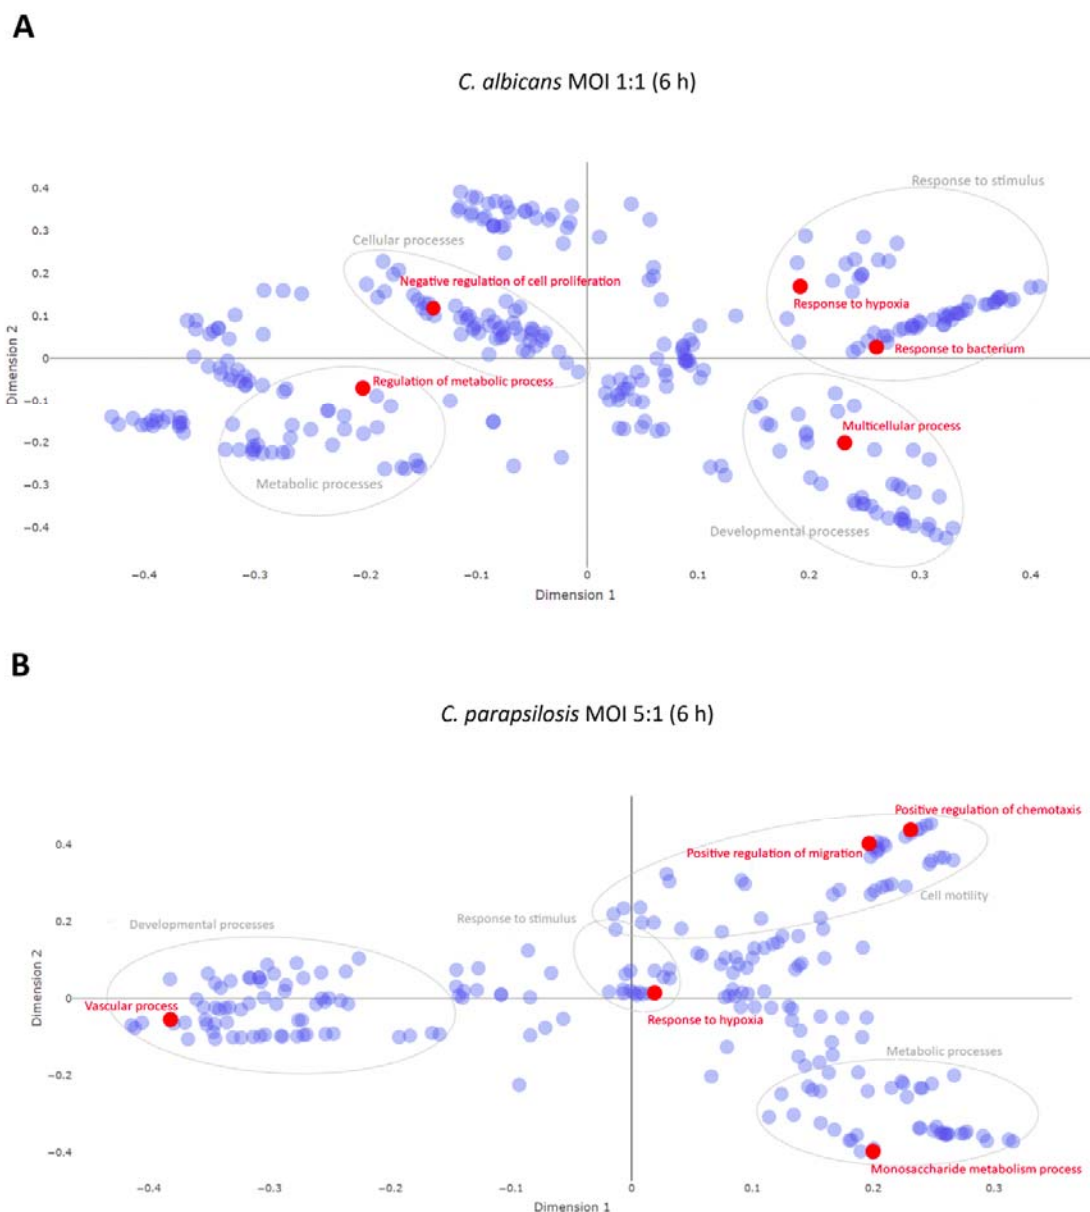

277

278

279 **FIG 4 - Multidimensional Scaling plot of target mRNA functions.** Potential effects of condition-specific  
280 miRNAs on transcriptomic responses. The potential functions of target mRNA were analyzed using cluster  
281 analyses of GO overrepresentation tests. Top 5 functions (shown in red) of target mRNAs at 6h *C. albicans* MOI  
282 1:1 treatment (A) and *C. parapsilosis* MOI 5:1 challenge (B). Grey circles represent the corresponding clusters  
283 of each highlighted functions.

284

285

286 **HIF1- $\alpha$ -pathway activation results in disrupted glucose metabolism after *C. parapsilosis***  
287 **stimulus, and survival promotion after *C. albicans* infection**

288 In addition to the several species-specifically activated signaling pathways, we found two -  
289 HIF1- $\alpha$  and hepatic stellate cell (HSC) activation signaling pathways - that were significantly  
290 regulated in all three experimental setups at 6 hours. Therefore, we examined these pathways  
291 in more depth. In the HIF1- $\alpha$ -pathway, the *C. parapsilosis* MOI 1:1, MOI 5:1 and *C. albicans*  
292 MOI 1:1 stimuli resulted in the significant up- or downregulation of 7, 11 and 15 genes,  
293 respectively. In each case, we found treatment-specific activated genes as well as genes whose  
294 expression altered under at least two conditions (FIG 5/A). The HIF1- $\alpha$ -signaling pathway  
295 was significantly activated during all three types of stimuli compared to the 'basal expression'  
296 level of the unstimulated cells. The effect was statistically most significant after the *C.*  
297 *parapsilosis* 5:1 treatment ( $p = 3.32e-08$ ), followed by *C. parapsilosis* MOI 1:1 ( $p = 3.99e-07$ )  
298 and *C. albicans* MOI 1:1 ( $p = 1.19e-06$ ) (FIG 5/B). We next examined potential functions that  
299 could be altered with HIF1 $\alpha$ -pathway deregulation. A similar activation pattern was observed  
300 in three of these biological processes: cell survival, migration, and angiogenesis. *C. albicans*  
301 clearly activated these processes (z-scores: 3.781, 3.185 and 3.481 of cell survival, migration,  
302 and angiogenesis, respectively), while the *C. parapsilosis* MOI 5: 1 treatment resulted in a  
303 similar effect, but activation occurred to a lesser extent (z-scores: 3.060, 2.789 and 3.879,  
304 respectively). The *C. parapsilosis* MOI 1: 1 stimulus led to only mild activation or even  
305 inhibition (z-score of survival: 1.601, angiogenesis: 0.860, migration: -0.19). Furthermore,  
306 extracellular matrix (ECM) synthesis inhibition was a characteristic of *C. albicans* treatment,  
307 while activation of glucose uptake and metabolism was a unique effect of the two *C.*  
308 *parapsilosis* stimuli (FIG 5/C).

309 Next, we aimed to examine potential correlations between the results of the transcriptome and  
310 miRNA analyses by identifying miRNA-target mRNA pairs. Such pairs were identified after  
311 both *C. albicans* and *C. parapsilosis* MOI 5: 1 co-culture, but none were found for the *C.*  
312 *parapsilosis* MOI 1: 1 condition (Figure 5 / D).

313 For *C. albicans*-treated ECs, miR-34b (downregulation, LFC= -1.87) and its potential target  
314 mRNA, TGF- $\alpha$  (transforming growth factor alpha; upregulation, LFC = 1.758) – a known  
315 regulator of cell proliferation and survival - was identified. Another miRNA-mRNA pair  
316 included miR-2110 (LFC= 5.00) and PIK3R3 (phosphoinositide-3-kinase regulatory subunit  
317 3; LFC= -2.53). In the case of *C. parapsilosis* MOI 5:1-treated ECs, miR-210 (LFC = 1.98)  
318 and its potential target CAMK2B (calcium-dependent protein kinase 2 beta; LFC= -2.36) and  
319 another miRNA, miR-92a (LFC= -1.85) were identified. The latter's potential HIF1- $\alpha$ -

320 pathway target elements include: EDN1 (endothelin-1 precursor; LFC= 2.11) and two glucose  
 321 transporters SLC2A1 (GLUT1; LFC= 2.552) and SLC2A14 (GLUT14; LFC= 3.555) (FIG  
 322 5/D). Interestingly, an overlap could also be observed among the applied conditions in terms  
 323 of the expression of specific target genes, but without the targeting miRNAs. This suggests,  
 324 that under the different conditions, the expression of the examined genes is possibly regulated  
 325 by other post- transcriptional regulatory processes.

326

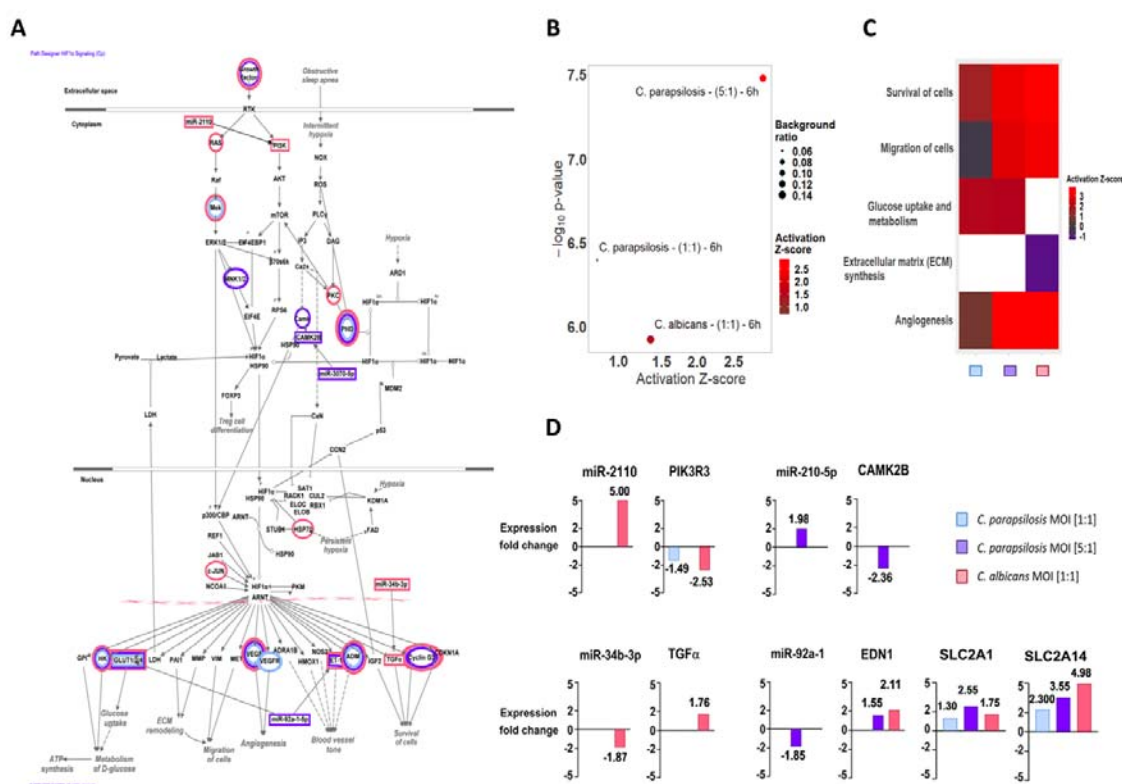

327

328 **FIG 5 -Results of the IPA analyses on HIF1- $\alpha$  signaling-related molecular components and functions.** (A)

329 Significantly down- or overexpressed genes in each condition were visualized within the canonical HIF1- $\alpha$

330 signal transduction network using pathway explorer and designer tools within IPA. The individual genes affected

331 by each treatment were marked by the corresponding colors of each condition: blue: *C. parapsilosis* MOI 1:1,

332 purple: MOI 5:1 and red: *C. albicans* MOI 1:1. (B) The significance of the pathway activation and direction

333 were determined by the p-value of overlap (<0.05) after performing an expression core analysis in IPA on the set

334 of DEGs in each applied condition. (C) The direction of activation of the functions regulated by this signaling

335 pathway was analyzed similarly, the blank rectangles (white) mean that we could not observe a significant

336 regulation of that particular biological function under after the corresponding treatment. (D) We selected the

337 miRNA-mRNA target pairs involved in this signaling pathway after applying several filtering steps in IPA's

338 miRNA target filter tools. We only considered pairs that showed significant, opposite regulation in

339 corresponding treatments, in which the targets were scientifically proven to be involved in HIF1- $\alpha$  signaling and  
340 the target site on the mRNA was either experimentally proven or strongly predicted by IPA based on base  
341 complementarity.

342

343 **Hepatic-fibrosis / stellate cell (HSC) activation-pathway discriminates between the**  
344 **strong and attenuated inflammatory response towards the two species**

345 The other signaling pathway that was simultaneously regulated by all three conditions after 6  
346 hours was the hepatic fibrosis or hepatic stellate cell (HSC) pathway - a pathway involved in  
347 stellate cell activation during hepatic inflammation and injury. The early signaling events  
348 during the activation of HSCs and in activated HSCs are shown on FIG 6/A. Similar to the  
349 HIF1-  $\alpha$  pathway, several genes showed either species-specific or treatment-influenced  
350 expression changes (FIG 6/A). The regulation of the signal transduction pathway by *C.*  
351 *parapsilosis* MOI 1: 1 and 5: 1 and *C. albicans* MOI 1: 1 was also statistically significant,  
352 although the direction of change could not be determined, due to the incoherent changes in  
353 gene expression (FIG 6/B). This pathway is associated with a number of biological functions  
354 related to inflammation, cellular activation, chemotaxis, apoptotic cell death or tumor cell  
355 proliferation. In general, *C. albicans* stimuli led to the overall activation of proinflammatory  
356 responses (e.g. upregulation of chemotaxis, cellular activation), while *C. parapsilosis*  
357 treatment resulted in either only a mild inflammatory response (e.g. immune cell activation  
358 with MOI 5:1), or no significant effect (chemotaxis and cellular activation with MOI 1:1; and  
359 inflammation and chemotaxis response for MOI 5:1) (FIG 6/C). Host cell apoptosis was  
360 inhibited by all three applied fungal conditions, although *C. parapsilosis* MOI 1:1 elicited the  
361 strongest inhibitory effect (z-score = -2.059). Interestingly, contrarily to the robust host tumor  
362 cell proliferation promoting effect of both *C. albicans* and *C. parapsilosis* MOI 5:1, the low  
363 dose application of *C. parapsilosis* led to a mild inhibitory effect (z-score = 2.260, 2.248 and -  
364 0.586, respectively) (FIG 6/C).

365 Similar to the HIF1-  $\alpha$  pathway, miRNA-mRNA target pairs could be identified after *C.*  
366 *albicans* and *C. parapsilosis* MOI 5: 1 stimulus, but not after the lower *C. parapsilosis*  
367 infection dose. Four miRNAs with altered expression were identified in *C. albicans* treated  
368 cells, namely miR-2110 (LFC= 5.00), miR-4485 (LFC= -2.19), miR-34b (LFC= -1.87), miR-  
369 4677 (LFC= -1.73), and their potential counterparts included IGFBP5 (insulin-like growth  
370 factor-binding protein 5; LFC= -3.81), KLF6 (kruppel-like factor 6; LFC= 1.58), TGF- $\alpha$   
371 (LFC= 1.76), and IL-8 (chemokine; LFC= 9.90), respectively (Figure 6/D). After *C.*

372 *parapsilosis* MOI 5:1 treatment, miR-92a and its potential target (EDN1) as well as miR-543  
373 (LFC= -3.38) and its potential target IGFBP3 (insulin-like growth factor-binding protein 3;  
374 LFC= 4.20) were identified. Although no regulatory miRNAs were identified after *C.*  
375 *parapsilosis* MOI 1:1 treatment, we found altered expressions of KLF6 and IGFBP5,  
376 suggesting that they were possibly regulated by other post- transcriptional regulatory  
377 processes.  
378 In this pathway, each of the targeted genes primarily affect inflammatory functions. Thus, the  
379 miRNA silencing observed here may contribute to the discrimination of the inflammatory  
380 response to *C. albicans* and *C. parapsilosis*.



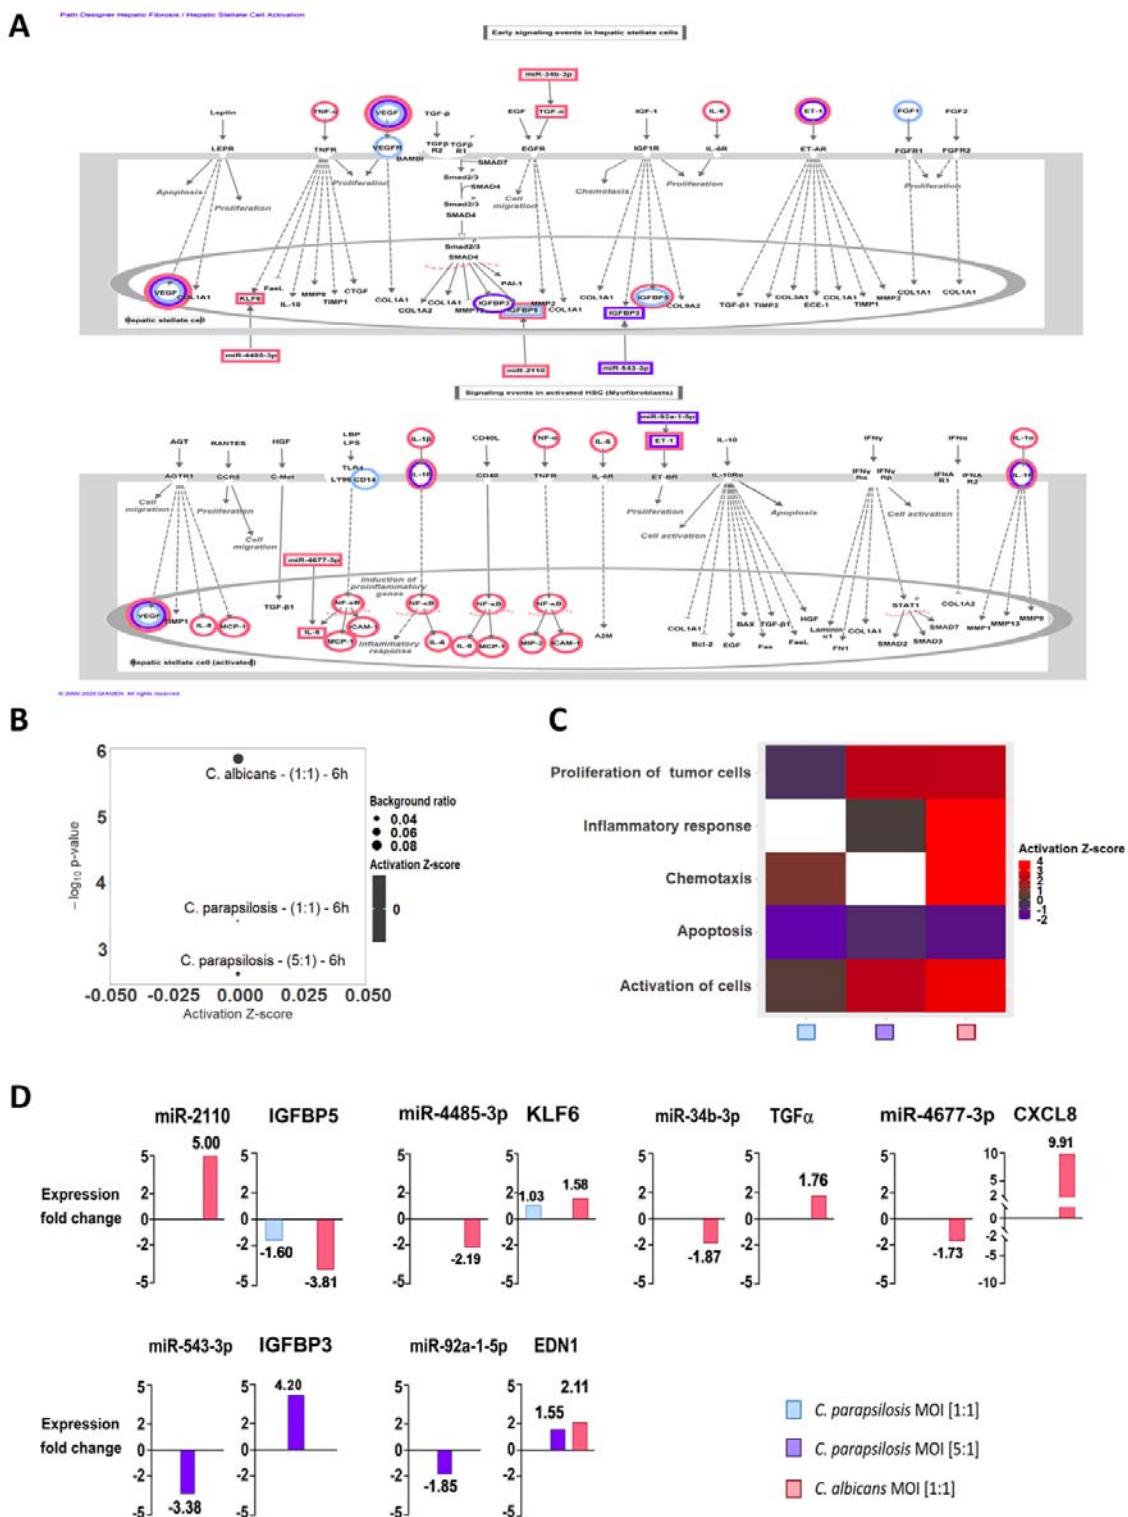

381

382 **FIG 6 - Results of the IPA analyses of Hepatic-fibrosis/stellate cell activation signaling.** (A) Similar to the

383 HIF1- $\alpha$  signal transduction network, regulated molecular components were visualized via pathway designer

384 tools; (B) direction of activation of the hepatic-fibrosis signaling related functions were analyzed after an

385 expression core analysis of the DEGs; (C) pathway activation was also examined and (D) miRNA-miRNA-  
386 targets were analyzed via miRNA target filter tools under similar conditions.

387

## 388 **Discussion**

389           In this study, we aimed to dissect and compare host responses triggered by *C. albicans*  
390 and *C. parapsilosis* - two common fungal residents of the oral microbial community - in oral  
391 ECs derived from a healthy individual (34). Our findings indicate that the EC immune  
392 response actively discriminates between *C. albicans* and *C. parapsilosis*, as shown by the  
393 significant differences in host LDH release, chemokine, cytokine and antimicrobial peptide  
394 responses. In our model, *C. parapsilosis* failed to evoke a robust, immediate proinflammatory  
395 response compared to *C. albicans*, which is similar to what has been observed in other  
396 experimental infection models (35–39). These findings are also comparable with earlier  
397 studies of *Candida* - EC interactions, showing that only *C. albicans* triggers a strong  
398 inflammatory response during the colonization of the oral epithelial barrier (36). To aid the  
399 understanding of how oral ECs might discriminate between the two species and thus  
400 distinguish a species with a higher pathogenic potential from one that more commonly is a  
401 mucosal commensal, we examined host cell transcriptomic changes following yeast-EC  
402 interaction.

403           Our findings revealed significant differences in host cell transcriptomic responses that  
404 were species-specific. With *C. albicans* co-culture, the majority of signaling routes and  
405 pathways were specific to the inflammatory response, and resulted in the activation of e.g.  
406 NF- $\kappa$ B and IL-17 signaling pathways (both are required for epithelium protection during oral  
407 candidiasis), which is in line with previous reports (40–42). *C. parapsilosis* challenge,  
408 however, led to the activation of various, mainly inflammation-independent pathways, such as  
409 carbohydrate metabolism-, hypoxia- and cardiovascular development -related responses, and,  
410 interestingly, pathways frequently associated with carcinogenesis, none of which have been  
411 previously associated with this species. Glucose homeostasis maintenance has recently been  
412 suggested to be required for efficient anti-*C. albicans* immune responses (43). According to  
413 Tucey et al., *C. albicans* depletes glucose from human and murine macrophages during  
414 infection, thereby accelerating host cell death. Although no studies are available comparing  
415 the carbon metabolism of *C. albicans* and *C. parapsilosis*, high glucose tolerance and rapid  
416 proliferation of *C. parapsilosis* in glucose rich parenteral nutrition has previously been  
417 reported (44–46). This suggests enhanced glucose metabolic processes in this species, and  
418 also that during *C. parapsilosis* infections regulation of host glucose metabolism, as a  
419 virulence factor, might be even more momentous. Although further research is required to  
420 confirm this hypothesis, considering that the highest risk group of *C. parapsilosis* infections  
421 includes low-birth weight neonates (47), the population primarily receiving parenteral

422 nutrition, interfering with the pathogen's carbon metabolic processes might reduce the risk of  
423 invasive candidiasis development in this patient group. Damaged tissues and inflammation are  
424 often coupled with local hypoxia (48). The lack of severe host cell damage and  
425 proinflammatory responses upon high-dose *C. parapsilosis* challenge, suggests that the  
426 significantly altered hypoxic responses have other origins. Such responses could arise simply  
427 due to the elevated fungal burden rapidly depleting available oxygen levels through the rapid  
428 outgrowth of host cells. Host responses related to cardiovascular development and the  
429 activation of pathways frequently associated with carcinogenesis during *C. parapsilosis*  
430 treatment are also unique. No such phenomenon has been previously associated with this  
431 species. Such novel information sets the ground for a new aspect of future experimental  
432 investigations in the field of *Candida* research together with cancer biology.

433 Besides the species-specific activated pathways, signaling pathways with simultaneous  
434 regulation by all three conditions were also found. Even among these, condition-specific  
435 transcriptional responses could be identified. One such pathway was hypoxia inducible factor  
436 1- $\alpha$  (HIF-1 $\alpha$ ) signaling. HIFs, especially HIF-1 $\alpha$ , have previously been demonstrated to  
437 regulate various innate immune processes (49). Although a study showed that HIF-1 $\alpha$   
438 activation by  $\beta$ -glucan and commensal bacteria promotes protection against subsequent *C.*  
439 *albicans* infections *in vivo* (50,51), suggesting the pathway's inclusion in anti-*Candida*  
440 responses, little is known about its role in antifungal immunity regulation. Our results suggest  
441 that activation of the HIF-1 $\alpha$  pathway is divergent. While *C. albicans* stimulus promoted  
442 signaling processes related to cell survival and migration, or inhibition of ECM synthesis,  
443 glucose uptake and metabolism-related processes dominated after *C. parapsilosis* co-culture.  
444 While regulation of EC protective cellular responses seems to be a priority in the case of *C.*  
445 *albicans*, in line with previous reports (52), regulation of carbohydrate metabolism appears to  
446 be a unique characteristic of *C. parapsilosis* stimulus. In the HSC-activation pathway, the  
447 other pathway simultaneously activated by all conditions, both species regulated signaling  
448 processes primarily involved in inflammation. Although *C. albicans* challenge resulted in the  
449 overall activation of proinflammatory responses, *C. parapsilosis* co-culture led to only a mild  
450 effect. Species-specific regulation of both HIF-1 $\alpha$  signaling and the HSC-activation pathway  
451 might be what determines the outcome of the triggered innate immune responses of oral ECs.

452 Subsequent miRNA analyses revealed condition-specific posttranscriptional regulation  
453 of the transcriptomic responses. Among the identified dysregulated miRNA-species, 4 were  
454 associated with co-culturing EC with *C. parapsilosis* MOI 1:1, 10 with MOI 5:1 and 18 with  
455 *C. albicans*. Among the miRNAs identified during *C. albicans* treatment, only miRNA-16-1p

456 has been previously associated with *C. albicans* infections (28). Out of the remaining 17  
457 differentially expressed miRNAs, miR-20a and hsa-let-7 have been reported to regulate anti-  
458 fungal responses, although only in *P. brasiliensis* (53). miR-16 and miR-4677 have been  
459 linked to antibacterial host responses (54,55), while miR-3074, miR-335, miR-34b, miR-4485  
460 and miR-1246 have been associated with antiviral immune responses in various *in vitro*  
461 models (56–60). The remaining 9 identified miRNA species have not yet been associated with  
462 microbe-induced inflammatory responses. In contrast, except for miR-3064 and miR-1294, all  
463 of the miRNAs differentially regulated in the presence of *C. parapsilosis* have been suggested  
464 to regulate host responses during microbial stimuli. miR-210 was previously associated with  
465 *C. albicans* (26), miR-125b with *P. brasiliensis* (61), and miR-92a with *P. americana*  
466 infections (62). Other than antifungal host responses, miR-4755 and miR-4677 deregulation  
467 was previously linked to bacterial stimuli (55,63), miR-1305, miR-627, miR-543 and miR-  
468 581 to viral challenge, and miR-12135 to parasitic infections (64). miR-1277 and miR-365  
469 were associated with host responses upon both bacterial and viral infections (65–69). Thus,  
470 although less miRNA species could be coupled with *C. parapsilosis* infections than with *C.*  
471 *albicans*, the majority of these were confirmed regulators of anti-microbial responses. It is  
472 noteworthy that several of the miRNAs identified after both *C. albicans* and *C. parapsilosis*  
473 stimuli have also been associated with various tumorigenic processes (70–75), further  
474 highlighting that fungal colonization might actively influence tumorigenic processes, as  
475 suggested previously (76,77).

476 Subsequent analyses revealed that the yeast-specifically identified miRNA-species  
477 regulate the expression of genes involved in condition-specific activated pathways, including  
478 survival, proliferation and inflammation in *C. albicans* and vascular development and  
479 carbohydrate metabolism-related pathways in *C. parapsilosis* co-cultures. For instance, miR-  
480 92a was identified in HIF1- $\alpha$  signaling, potentially regulating the expression of GLUT1  
481 (SLC2A1) and GLUT14 (SLC2A14), two glucose transporters required for carbohydrate  
482 metabolism maintenance (78) as well as the expression of EDN1 (endothelin-1) (79), a potent  
483 vasoconstrictor, during *C. parapsilosis* infection. The finding that both GLUT1 and GLUT14  
484 are also upregulated upon *C. albicans* stimulus suggests, that the significant activation of  
485 carbohydrate metabolic processes by *C. parapsilosis* is the result of an additive effect and  
486 glucose metabolic regulators, other than the mentioned glucose transporters, are also  
487 deregulated during the stimulus. In the same pathway, following *C. albicans* challenge, miR-  
488 34b was linked to TGF- $\alpha$  expression, a known regulator of survival and cell proliferation after  
489 its activation by hypoxia-induced factors (such as HIF1- $\alpha$ ) (80), and miR-2110 was found to

490 repress PIK3R3 expression, a subunit of PI3K, thereby interfering with proinflammatory  
491 responses (81,82).

492 In the HSC-activation pathway, besides miR-92a and its target EDN-1, miR-543 was  
493 also identified, which targets IGFBP3, an IGF binding protein previously linked to apoptosis  
494 regulatory processes (83). Although independent of IGFBP3 expression changes, apoptosis  
495 inhibition as a potential outcome of HSC-activation was predicted to be the strongest  
496 following the low-dose *C. parapsilosis* treatment. With *C. albicans* infection, besides the  
497 abovementioned miR-34b - TGF- $\alpha$  pair, miR-2110 was identified as a potential regulator of  
498 IGFBP5, miR-4485 was linked to KLF6 regulation and miR-467 to regulating CXCL8  
499 expression. KLF6 is a zinc finger transcription factor previously reported to promote  
500 inflammation in macrophages (84). IGFBP5, another IGF binding protein, was reported to be  
501 a potent chemoattractant of immune cells (85). CXCL8 is a well-known chemokine secreted  
502 by oral ECs upon *C. albicans* stimuli (86), in line with our data. Thus, all three miRNA target  
503 genes are potential inflammation regulatory components of the anti-*C. albicans* oral EC  
504 response.

505 Taken together, the in-depth analyses of the two simultaneously, yet diversely  
506 regulated signaling pathways also support the major, species-specific findings of the  
507 transcriptome functional analyses, and suggest that the differentiating EC responses might  
508 indeed derive from altered posttranscriptional regulations. Although the obtained results shed  
509 some light on the potential underlying molecular mechanisms enabling species-specific host  
510 responses, further investigations and experimental studies are required to support these  
511 findings.

512 In summary, we can conclude that human oral ECs are able to actively differentiate  
513 between *Candida* species through altered posttranscriptional regulatory processes. (FIG 7).  
514 While the presence of *C. parapsilosis* stimulus does not generate a robust inflammatory  
515 response in ECs, an elevated fungal burden can initiate inflammatory responses, albeit in a  
516 much less rapid and robust manner compared to *C. albicans*. Additionally, we found that  
517 different fungal burdens of *C. parapsilosis* led to the variable induction of generic alterations  
518 with the higher MOI inducing a broader and more significant response. The species-specific  
519 fine tuning of both HIF-1 $\alpha$  signaling and HSC-activation pathways via miRNA silencing  
520 could also be a key to the distinct epithelial responses. The *in silico* data acquired through this  
521 project aid our current understanding of how healthy oral ECs might discriminate between  
522 *Candida* species with high or low pathogenic potential in the human oral mucosa.

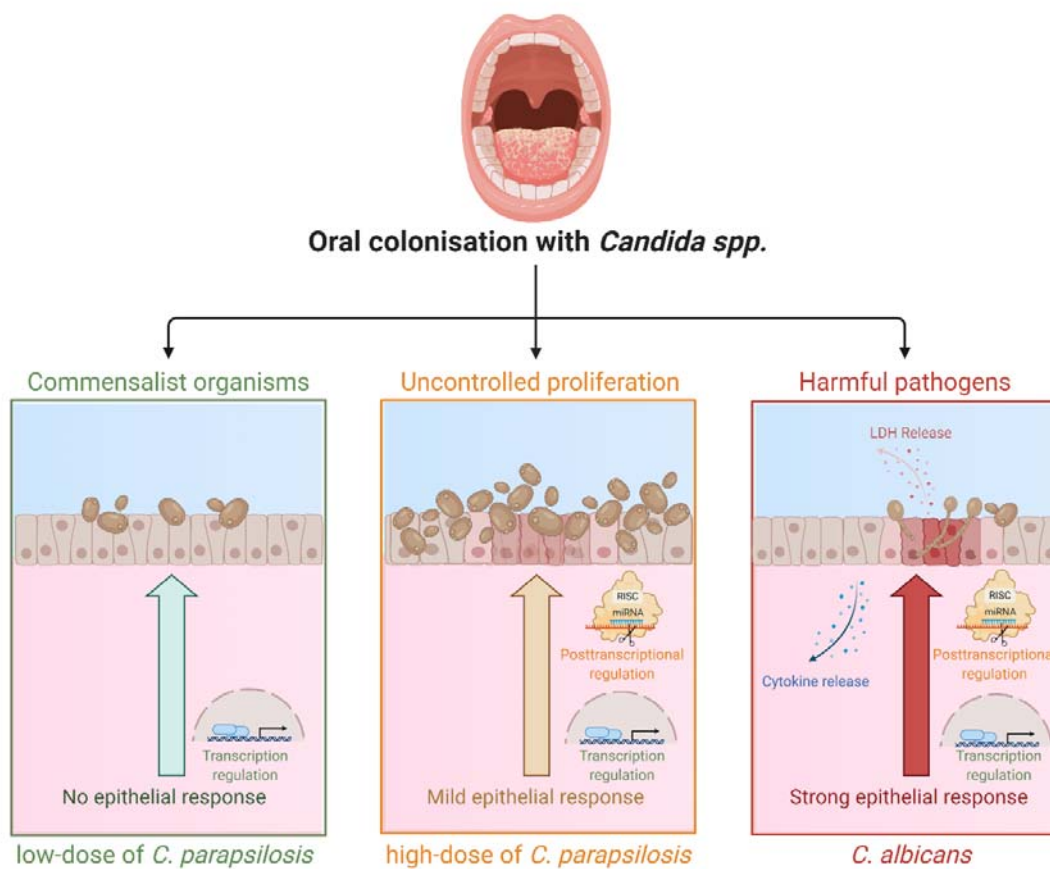

523

524 **FIG 7 - Altered innate immune response regulation in healthy oral ECs discriminate between low-dose *C.***  
525 ***parapsilosis*, increased dose of *C. parapsilosis* and *C. albicans* stimuli.**

526

## 527 **Materials and Methods**

### 528 **Strains and growth conditions**

529 In this study, *C. parapsilosis* CLIB 214 and *C. albicans* SC5314 laboratory strains were used.  
530 *Candida* strains were maintained on solid penicillin/streptomycin-supplemented YPD  
531 medium at 4°C. Prior to host cell stimulation, yeast cells were grown overnight at 30°C in  
532 liquid YPD medium, washed 3x with phosphate-buffered saline (PBS) and counted using a  
533 haemocytometer to adjust the desired cell concentration.

534

### 535 **Stimulation of OKF6/TERT2 cells**

536 The oral EC line OKF6/TERT2, a telomerase deficient EC line derived from a healthy  
537 individual, was used for all experiments and maintained as described previously (34). Oral  
538 ECs were then plated in 6-well plates in keratinocyte serum-free medium (K-SFM)  
539 supplemented with 25 µg/ml BPE, 2 ng/ml rEGF, 2mM L-Glutamine and 0.5% penicillin-  
540 streptomycin and cells were grown to 90% confluency. OKF6/TERT2 cells were then  
541 stimulated with *C. parapsilosis* and *C. albicans* in serum-free K-SFM medium. Depending on  
542 the experiment, either cell free supernatants or host cells were collected following fungal  
543 exposure and stored at -80°C or used immediately.

544

### 545 **Lactate dehydrogenase assay**

546 Host cell damage by *C. albicans* and *C. parapsilosis* was determined by LDH cytotoxicity  
547 detection kit according to the manufacturer's instructions. OKF6/TERT2 cells were  
548 challenged with fungal cells at MOIs of 1:5, 1:2, 1:1, 2:1 and 5:1 or left untreated at various  
549 time points. During analysis, the values corresponding to the levels of LDH activity measured  
550 in untreated samples were subtracted from the values of stimulated samples. The percentage  
551 of cytotoxicity was determined as  $(\text{OD experimental value}/\text{OD positive control}) \times 100$ . 1%  
552 Triton X-100 treated samples served as positive controls. Results are derived from 3 triplicate  
553 experiments.

554

### 555 **Total RNA and miRNA extraction**

556 Total RNA and miRNA extraction from OKF6/TERT2 cells were carried out with miRNeasy  
557 Mini Kits according to the manufacturer's instructions, allowing for the simultaneous  
558 extraction of total RNA and miRNA. Cells were grown until 90% confluency in tissue  
559 culturing 6-well-plates in supplemented K-SFM medium, washed once with PBS, and  
560 stimulated with *C. albicans* (MOI of 1:1) or *C. parapsilosis* (MOI of 1:1 and/or 5:1) in



561 unsupplemented K-SFM medium. Following co-incubation, host cells were washed 2x with  
562 PBS and treated with the supplied TRIzol lysis reagent. After host cell lysis, phase separation  
563 and purification of RNA (both total and miRNA), we performed quantity and quality checks  
564 of the samples before proceeding to cDNA library preparation or cDNA synthesis and  
565 subsequent sequencing. Three independently treated biological parallels were used.

566

#### 567 **cDNA synthesis and real-time PCR analysis**

568 For preliminary expression studies, 1000 ng of RNA was utilized for cDNA synthesis using  
569 the RevertAid first strand cDNA synthesis kit. Primers for qPCR analyses are listed in Table  
570 S1. The amplification conditions were as follows: one cycle of denaturation for 3 min at 95°C;  
571 denaturation at 95°C for 10 s; 49 cycles of annealing at 60°C for 30 s, and elongation at 65°C  
572 for 30 s; with a final extension step at 72°C for 30 s.  $\beta$ 2-microglobulin was used as an internal  
573 control. Relative normalized expression values (unstimulated host cells served as controls)  
574 were calculated and presented.

575

#### 576 **Sequencing library preparation and RNA-sequencing**

577 miRNA sequencing libraries were prepared using NEBNext Multiplex Small RNA Library  
578 Prep Set for Illumina following the manufacturer's protocol. Libraries were size selected  
579 using AMPure XP beads and after validation with an Agilent 2100 Bioanalyzer instrument  
580 sequenced with an Illumina MiSeq DNA sequencer using Illumina MiSeq Reagent kit V3-  
581 150.

582

#### 583 **Transcriptome analysis**

584 We performed the preliminary quality analysis and trimming using FastQC and Cutadapt  
585 command line tools on the raw sequence files. Next, we fit the reads to the reference genome  
586 index (GRCh38) using HISAT2 (88), with the parameters --dta --non-deterministic --rna-  
587 strandness. Read numbers were calculated using the GenomicAlignments package, and  
588 differential gene expression in logarithmic fold change (LFC) was then performed using the  
589 DeSeq2 tool (89). We filtered out objects with read counts lower than 1 part per million  
590 (ppm). In the experimentally derived gene list, differentially expressed genes (DEGs) were  
591 counted above the absolute value of the logarithmic fold change  $> 1.5$  and the adjusted p-  
592 value  $< 0.05$ .

593

## 594 **Short-read mapping and counting**

595 The sequenced reads were mapped to known microRNA precursors, and novel sequences  
596 downloaded from miRBase (version 22) using miRDeep2.0 (90). Hits with a read count below  
597 1 ppm were filtered out from further analysis. The distorting effect caused by the hits that  
598 were expressed at an exceptionally high level (and have the largest variance) was corrected  
599 via DeSeq2, and the p-value corrected by null distribution using the fdrtool package. The cut-  
600 off values for the significant hits were set at a p-value  $< 0.05$  and the absolute value of the  
601 logarithmic fold change  $> 1.5$ .

602

## 603 **Overrepresentation analyses**

604 Upon completion of the genome-wide RNA and miRNA expression analyses, gene expression  
605 data was interpreted using overrepresentation analyses (ORA) and gene-set enrichment  
606 analyses (GSEA) provided in the Bioconductor package, DOSE (91) and clusterProfiler (92)  
607 (FIG 3/A). The two ORAs - KEGG over-representation test and GO over-representation test -  
608 as well as the GO GSEA were carried out, against a constant background, for which purpose,  
609 the human genome wide annotation package ('org.Hs.eg.db') was used (93). During both  
610 analyses the most robust Benjamini & Hochberg (1995) ("BH") method was used for the  
611 multiple comparison p-value adjustment, and pathways  $p < 0.05$  were considered significantly  
612 overrepresented. The enrichment results were visualized as dotplots via the enrichplot  
613 package. For further data mining, we calculated the semantic similarity (SS) of the found GO  
614 terms to establish connections between genes targeted by a specific miRNA via the  
615 ViSEAGO package (<https://doi.org/10.1186/s13040-019-0204-1>). These results were  
616 visualized on a multidimensional scaling plot (MDS) that represents the distance among the  
617 set of enriched GO terms on the first two dimensions, which highlight possible clustering  
618 patterns.

619

## 620 **Causal analyses**

621 We employed causal analysis methods included in the Qiagen licensed, leading-edge  
622 bioinformatical software Ingenuity Pathway Analysis (IPA) and we ran expression core  
623 analyses on our samples. Among the included algorithms, we used downstream Effect  
624 Analysis (DEA) to observe each treatment's effect on the biological functions of the host  
625 cells. Furthermore, we concluded miRNA-target analyses to find possible miRNA-mRNA  
626 target pairs with significant, anti-correlated expression. We employed the p-value of overlap  
627 and the activation Z-score to determine the significance of the prediction in IPA, which are

628 the two most important parameters to achieve this (94). The p-value of overlap determines the  
629 statistical significance based on the overlap of the observed and predicted regulated gene sets,  
630 while the activation Z-score predicts the direction of regulation depending on the parallelism  
631 in the observed and predicted over / down-regulatory patterns. In our experiments, only the  
632 predictions with p-value <0.05 were considered significant hits. We further specified that only  
633 experimentally proven or strongly predicted intermolecular relationships should be  
634 considered.

635

### 636 **Statistical analysis**

637 All statistical analyses were performed with GraphPad Prism v 6.0 software using parametric  
638 *t* tests or nonparametric Mann-Whitney tests. The values for the groups examined were  
639 considered statistically significantly different at  $p < 0.05$ .

640

### 641 **Data availability**

642 Data upload is in progress. Further data are available upon request from the corresponding  
643 author.

644

### 645 **Competing interests**

646 The authors declare no conflict of interest.

647

### 648 **Acknowledgements**

649 MH and this research work was supported by the Szeged Scientists Academy under the  
650 sponsorship of the Hungarian Ministry of Innovation and Technology (FEIF/433-4/2020-  
651 ITM\_SZERZ). This work was supported by grants 20391-3/2018/FEKUSTRAT, NKFIH K  
652 123952, and GINOP-2.3.2.-15-2016-00015. A.G. was further funded by LP2018-15/2018.

653 This study was also supported by the Hungarian National Research, Development and  
654 Innovation Office (NKFIH) grant GINOP-2.3.2-15-2016-00035.

655 László Bodai was supported by the ÚNKP-20-5-SZTE-642 New National Excellence  
656 Program of the Ministry for Innovation and Technology and by the János Bolyai Research  
657 Scholarship (BO/00522/19/8) of the Hungarian Academy of Sciences.

658

### 659 **Author contributions:**

660 AG and RT contributed to the concept and design of this project. MH and RT carried out the  
661 majority of experiments with the help of GN, NZs, CsV, JDN. MH and GN, LB, PH analyzed  
662 the aquired data. MH prepared the manuscript and the figures, that was revised by R.T. with  
663 A.G. All authors reviewed the manuscript, contributed to the discussion and approved the  
664 final version.



666 **Supplementary Tables**

667 **Table S1** - List of primers used for qPCR analyses.

668 **Table S2** - Identified differentially expressed genes (DEGs) following fungal stimuli.

669 **Table S3** - List of miRNA-specific target mRNAs identified following *C. parapsilosis* MOI  
670 1:1 stimulus.

671 **Table S4** - List of miRNA-specific target mRNAs identified following *C. parapsilosis* MOI  
672 5:1 stimulus.

673 **Table S5** - List of miRNA-specific target mRNAs identified following *C. albicans* MOI 1:1  
674 stimulus.

675 **Table S6** - KEGG analysis results of *C. albicans* MOI 1:1 stimulus after 6 hours.

676 **Table S7** - GO term analysis results of *C. albicans* MOI 1:1 stimulus after 6 hours.

677 **Table S8** - KEGG analysis results of *C. parapsilosis* MOI 1:1 stimulus after 6 hours.

678 **Table S9** - GO term analysis results of *C. parapsilosis* MOI 1:1 stimulus after 6 hours.

679 **Table S10** - KEGG analysis results of *C. parapsilosis* MOI 5:1 stimulus after 6 hours.

680 **Table S11** - GO term analysis results of *C. parapsilosis* MOI 5:1 stimulus after 6 hours.

681 **Table S12** - GO term analysis results of miRNA-specific target mRNAs identified following  
682 *C. albicans* MOI 1:1 stimulus.

683 **Table S13** - GO term analysis results of miRNA-specific target mRNAs identified following  
684 *C. parapsilosis* MOI 5:1 stimulus.

685

686

687

688 **References**

- 689 1. Avila PC, Schleimer RP. Airway epithelium. In: Allergy and Allergic Diseases, Second  
690 Edition. Wiley-Blackwell; 2009. p. 366–97.
- 691 2. Schleimer RP, Kato A, Kern R, Kuperman D, Avila PC. Epithelium: At the interface of  
692 innate and adaptive immune responses. Vol. 120, Journal of Allergy and Clinical  
693 Immunology. 2007.
- 694 3. Calderone RA, Clancy CJ. Candida and candidiasis. American Society for  
695 Microbiology Press; 2011.
- 696 4. Vázquez-González D, Perusquía-Ortiz AM, Hundeiker M, Bonifaz A. Opportunistic  
697 yeast infections: Candidiasis, cryptococcosis, trichosporonosis and geotrichosis. JDDG  
698 - J Ger Soc Dermatology. 2013;11(5).
- 699 5. Pappas PG, Lionakis MS, Arendrup MC, Ostrosky-Zeichner L, Kullberg BJ. Invasive  
700 candidiasis. Nat Rev Dis Prim. 2018;4(1):18026.
- 701 6. Sobel JD. The emergence of non-albicans Candida species as causes of invasive  
702 candidiasis and candidemia. Vol. 8, Current Infectious Disease Reports. 2006. p. 427–  
703 33.
- 704 7. Manolakaki D, Velmahos GC, Kourkoumpetis T, Chang Y, Alam HB, De Moya MM,  
705 et al. Candida infection and colonization among trauma patients. Virulence. 2010;
- 706 8. Ghannoum MA, Jurevic RJ, Mukherjee PK, Cui F, Sikaroodi M, Naqvi A, et al.  
707 Characterization of the oral fungal microbiome (mycobiome) in healthy individuals.  
708 PLoS Pathog. 2010 Jan;6(1).
- 709 9. Peters BA, Wu J, Hayes RB, Ahn J. The oral fungal mycobiome: Characteristics and  
710 relation to periodontitis in a pilot study. BMC Microbiol. 2017;
- 711 10. Berkovits C, Toth A, Szenzenstein J, Deak T, Urban E, Gacser A, et al. Analysis of  
712 oral yeast microflora in patients with oral squamous cell carcinoma. Springerplus.  
713 2016/08/19. 2016;5(1):1257.
- 714 11. Olivas-Escárcega V, Ruiz-Rodríguez MDS, Fonseca-Leal MDP, Santos-Díaz MÁ,  
715 Gordillo-Moscoso A, Hernández-Sierra JF, et al. Prevalence of oral candidiasis in  
716 chronic renal failure and renal transplant pediatric patients. J Clin Pediatr Dent.  
717 2008;32(4).
- 718 12. Abu-Elteen KH, Hamad MA, Salah SA. Prevalence of oral candida infections in  
719 diabetic patients. Bahrain Med Bull. 2006;28(1).
- 720 13. Singh GK, Capoor MR, Nair D, Bhowmik KT. Spectrum of fungal infection in head

- 721 and neck cancer patients on chemoradiotherapy. *J Egypt Natl Canc Inst.* 2017;29(1).
- 722 14. Gaitán-Cepeda LA, Sánchez-Vargas O, Castillo N. Prevalence of oral candidiasis in  
723 HIV/AIDS children in highly active antiretroviral therapy era. A literature analysis.  
724 Vol. 26, *International Journal of STD and AIDS.* 2015.
- 725 15. Almeida RS, Brunke S, Albrecht A, Thewes S, Laue M, Edwards JE, et al. The hyphal-  
726 associated adhesin and invasin Als3 of *Candida albicans* mediates iron acquisition from  
727 host ferritin. *PLoS Pathog.* 2008;
- 728 16. Noble SM, Gianetti BA, Witchley JN. *Candida albicans* cell-type switching and  
729 functional plasticity in the mammalian host. *Nature Reviews Microbiology.* 2017.
- 730 17. Moyes DL, Wilson D, Richardson JP, Mogavero S, Tang SX, Wernecke J, et al.  
731 *Candidalysin* is a fungal peptide toxin critical for mucosal infection. *Nature.* 2016;
- 732 18. Moyes DL, Runglall M, Murciano C, Shen C, Nayar D, Thavaraj S, et al. A biphasic  
733 innate immune MAPK response discriminates between the yeast and hyphal forms of  
734 *Candida albicans* in epithelial cells. *Cell Host Microbe.* 2010/09/14. 2010;8(3):225–35.
- 735 19. Tóth R, Nosek J, Mora-Montes HM, Gabaldon T, Bliss JM, Nosanchuk JD, et al.  
736 *Candida parapsilosis*: From genes to the bedside. *Clinical Microbiology Reviews.*  
737 2019.
- 738 20. Rippon JW. *Medical mycology; the pathogenic fungi and the pathogenic*  
739 *actinomycetes.* Eastbourne, UK; WB Saunders Company; 1982.
- 740 21. Dismukes WE, Pappas PG, Sobel JD. *Clinical mycology.* Oxford University press,  
741 USA; 2003.
- 742 22. Tata W, Thepbundit V, Kuansuwan C, Preechasuth K. Distribution of *Candida* species  
743 in oral candidiasis patients: Association between sites of isolation, ability to form  
744 biofilm, and susceptibility to antifungal drugs. 2019 Jan 1;1–7.
- 745 23. Jayachandran AL, Katragadda R, Thyagarajan R, Vajravelu L, Manikesi S, Kaliappan  
746 S, et al. Oral Candidiasis among Cancer Patients Attending a Tertiary Care Hospital in  
747 Chennai, South India: An Evaluation of Clinicomycological Association and  
748 Antifungal Susceptibility Pattern. *Can J Infect Dis Med Microbiol.*  
749 2016;2016:8758461.
- 750 24. Nahid MA, Satoh M, Chan EKL. MicroRNA in TLR signaling and endotoxin  
751 tolerance. Vol. 8, *Cellular and Molecular Immunology.* 2011.
- 752 25. Nahid MA, Satoh M, Chan EKL. Interleukin 1 $\beta$ -Responsive MicroRNA-146a Is  
753 Critical for the Cytokine-Induced Tolerance and Cross-Tolerance to Toll-Like Receptor  
754 Ligands. *J Innate Immun.* 2015;7(4).

- 755 26. Du L, Chen X, Duan Z, Liu C, Zeng R, Chen Q, et al. MiR-146a negatively regulates  
756 dectin-1-induced inflammatory responses. *Oncotarget*. 2017;8(23).
- 757 27. Monk CE, Hutvagner G, Arthur JSC. Regulation of miRNA transcription in  
758 macrophages in response to candida albicans. *PLoS One*. 2010;
- 759 28. Muhammad SA, Fatima N, Syed NIH, Wu X, Yang XF, Chen JY. MicroRNA  
760 expression profiling of human respiratory epithelium affected by invasive candida  
761 infection. *PLoS One*. 2015;10(8).
- 762 29. Khurshid Z, Naseem M, Sheikh Z, Najeeb S, Shahab S, Zafar MS. Oral antimicrobial  
763 peptides: Types and role in the oral cavity. Vol. 24, *Saudi Pharmaceutical Journal*.  
764 2016.
- 765 30. Bals R. Epithelial antimicrobial peptides in host defense against infection. Vol. 1,  
766 *Respiratory Research*. 2000.
- 767 31. Németh T, Tóth A, Szenzenstein J, Horváth P, Nosanchuk JD, Grózer Z, et al.  
768 Characterization of Virulence Properties in the *C. parapsilosis* Sensus Lato Species.  
769 *PLoS One*. 2013;8(7).
- 770 32. Horváth P, Nosanchuk JD, Hamari Z, Vágvölgyi C, Gácsér A. The identification of  
771 gene duplication and the role of secreted aspartyl proteinase 1 in *Candida parapsilosis*  
772 virulence. *J Infect Dis*. 2012;205(6).
- 773 33. Tóth A, Németh T, Csonka K, Horváth P, Vágvölgyi C, Vizler C, et al. Secreted  
774 *Candida parapsilosis* lipase modulates the immune response of primary human  
775 macrophages. *Virulence*. 2014;5(4).
- 776 34. Hahn WC, Ino Y, Ronfard V, Wu JYd, Weinberg R a, Louis DN, et al. Human  
777 keratinocytes that express hTERT and also bypass a p16(INK4a)-enforced mechanism  
778 that limits life span become immortal yet retain normal growth and differentiation  
779 characteristics. *Mol Cell Biol*. 2000;20(4).
- 780 35. Toth A, Csonka K, Jacobs C, Vagvolgyi C, Nosanchuk JD, Netea MG, et al. *Candida*  
781 *albicans* and *Candida parapsilosis* induce different T-cell responses in human  
782 peripheral blood mononuclear cells. *J Infect Dis*. 2013/05/11. 2013;208(4):690–8.
- 783 36. Moyes DL, Murciano C, Runglall M, Kohli A, Islam A, Naglik JR. Activation of  
784 MAPK/c-Fos induced responses in oral epithelial cells is specific to *Candida albicans*  
785 and *Candida dubliniensis* hyphae. *Med Microbiol Immunol*. 2011/06/28.  
786 2012;201(1):93–101.
- 787 37. Villar CC, Kashleva H, Mitchell AP, Dongari-Bagtzoglou A. Invasive phenotype of  
788 *Candida albicans* affects the host proinflammatory response to infection. *Infect Immun*.



- 789 2005;73(8).
- 790 38. Weindl G, Naglik JR, Kaesler S, Biedermann T, Hube B, Korting HC, et al. Human  
791 epithelial cells establish direct antifungal defense through TLR4-mediated signaling. *J*  
792 *Clin Invest.* 2007/11/10. 2007;117(12):3664–72.
- 793 39. Hirayama T, Miyazaki T, Ito Y, Wakayama M, Shibuya K, Yamashita K, et al.  
794 Virulence assessment of six major pathogenic *Candida* species in the mouse model of  
795 invasive candidiasis caused by fungal translocation. *Sci Rep.* 2020;10(1).
- 796 40. Mengesha BG, Conti HR. The role of IL-17 in protection against mucosal *Candida*  
797 infections. Vol. 3, *Journal of Fungi.* 2017.
- 798 41. Verma AH, Richardson JP, Zhou C, Coleman BM, Moyes DL, Ho J, et al. Oral  
799 epithelial cells orchestrate innate type 17 responses to *Candida albicans* through the  
800 virulence factor candidalysin. *Sci Immunol.* 2017;2(17).
- 801 42. Naglik JR, König A, Hube B, Gaffen SL. *Candida albicans*–epithelial interactions and  
802 induction of mucosal innate immunity. Vol. 40, *Current Opinion in Microbiology.*  
803 2017.
- 804 43. Tucey TM, Verma J, Harrison PF, Snelgrove SL, Lo TL, Scherer AK, et al. Glucose  
805 Homeostasis Is Important for Immune Cell Viability during *Candida* Challenge and  
806 Host Survival of Systemic Fungal Infection. *Cell Metab.* 2018;27(5).
- 807 44. Trofa D, Gácsér A, Nosanchuk JD. *Candida parapsilosis*, an Emerging Fungal  
808 Pathogen. *Clin Microbiol Rev.* 2008 Oct;21(4):606–25.
- 809 45. Pereira L, Silva S, Ribeiro B, Henriques M, Azeredo J. Influence of glucose  
810 concentration on the structure and quantity of biofilms formed by *Candida parapsilosis*.  
811 *FEMS Yeast Res.* 2015;15(5).
- 812 46. Solomon SL, Khabbaz RF, Parker RH, Anderson RL, Geraghty MA, Furman RM, et  
813 al. An Outbreak of *Candida parapsilosis* Bloodstream Infections in Patients Receiving  
814 Parenteral Nutrition. *J Infect Dis.* 1984 Jan 1;149(1):98–102.
- 815 47. Pammi M, Holland L, Butler G, Gacsér A, Bliss JM. *Candida parapsilosis* is a  
816 significant neonatal pathogen a systematic review and meta-analysis. *Pediatr Infect Dis*  
817 *J.* 2013;32(5).
- 818 48. Krzywinska E, Stockmann C. Hypoxia, metabolism and immune cell function. Vol. 6,  
819 *Biomedicines.* 2018.
- 820 49. Zinkernagel AS, Johnson RS, Nizet V. Hypoxia inducible factor (HIF) function in  
821 innate immunity and infection. Vol. 85, *Journal of Molecular Medicine.* 2007.
- 822 50. Esher SK, Fidel PL, Noverr MC. *Candida*/staphylococcal polymicrobial intra-

- 823 abdominal infection: pathogenesis and perspectives for a novel form of trained innate  
824 immunity. Vol. 5, Journal of Fungi. 2019.
- 825 51. Cheng S-C, Quintin J, Cramer RA, Shephardson KM, Saeed S, Kumar V, et al. mTOR-  
826 and HIF-1 $\alpha$ -mediated aerobic glycolysis as metabolic basis for trained immunity.  
827 Science (80- ). 2014;345(6204).
- 828 52. Muñoz JF, Delorey T, Ford CB, Li BY, Thompson DA, Rao RP, et al. Coordinated  
829 host-pathogen transcriptional dynamics revealed using sorted subpopulations and  
830 single macrophages infected with *Candida albicans*. Nat Commun. 2019;10(1).
- 831 53. Marioto DTG, Dos Santos Ferraro ACN, De Andrade FG, Oliveira MB, Itano EN,  
832 Petrofeza S, et al. Study of differential expression of miRNAs in lung tissue of mice  
833 submitted to experimental infection by *Paracoccidioides brasiliensis*. Med Mycol.  
834 2017;55(7).
- 835 54. Moon H-G, Yang J, Zheng Y, Jin Y. miR-15a/16 Regulates Macrophage Phagocytosis  
836 after Bacterial Infection. J Immunol. 2014;193(9).
- 837 55. de Araujo LS, Ribeiro-Alves M, Leal-Calvo T, Leung J, Durán V, Samir M, et al.  
838 Reprogramming of small noncoding RNA populations in peripheral blood reveals host  
839 biomarkers for latent and active mycobacterium tuberculosis infection. MBio.  
840 2019;10(6).
- 841 56. Xu LJ, Jiang T, Zhao W, Han JF, Liu J, Deng YQ, et al. Parallel mRNA and  
842 microRNA profiling of HEV71-infected human neuroblastoma cells reveal the up-  
843 regulation of miR-1246 in association with DLG3 repression. PLoS One. 2014;9(4).
- 844 57. Guo L, Wang Q, Zhang D. MicroRNA-4485 ameliorates severe influenza pneumonia  
845 via inhibition of the STAT3/PI3K/AKT signaling pathway. Oncol Lett. 2020;20(5).
- 846 58. Lv J, Zhang Z, Pan L, Zhang Y. MicroRNA-34/449 family and viral infections. Vol.  
847 260, Virus Research. 2019.
- 848 59. Dhorne-Pollet S, Crisci E, Mach N, Renson P, Jaffrézic F, Marot G, et al. The miRNA-  
849 targeted transcriptome of porcine alveolar macrophages upon infection with Porcine  
850 Reproductive and Respiratory Syndrome Virus. Sci Rep. 2019;9(1).
- 851 60. Oliver GF, Orang A V., Appukuttan B, Marri S, Michael MZ, Marsh GA, et al.  
852 Expression of microRNA in human retinal pigment epithelial cells following infection  
853 with Zaire ebolavirus. BMC Res Notes. 2019;12(1).
- 854 61. De Lacorte Singulani J, De Fátima Da Silva J, Gullo FP, Costa MC, Fusco-Almeida  
855 AM, Enguita FJ, et al. Preliminary evaluation of circulating microRNAs as potential  
856 biomarkers in paracoccidioidomycosis. Biomed Reports. 2017;6(3).

- 857 62. Singulani J de L, da Silva J de F, Gullo FP, Costa MC, Fusco-Almeida AM, Enguita  
858 FJ, et al. Fungal-host interactions: Insights into microRNA in response to  
859 paracoccidioides species. *Mem Inst Oswaldo Cruz.* 2020;115(7).
- 860 63. Cer RZ, Herrera-Galeano JE, Frey KG, Schully KL, Luu T V., Pesce J, et al.  
861 Differential MicroRNA Analyses of *Burkholderia pseudomallei* - and *Francisella*  
862 *tularensis* -Exposed hPBMCs Reveal Potential Biomarkers. *Int J Genomics.* 2017;2017.
- 863 64. Medina L, Castillo C, Liempi A, Guerrero-Muñoz J, Rojas-Pirela M, Maya JD, et al.  
864 *Trypanosoma cruzi* and *Toxoplasma gondii* Induce a Differential MicroRNA Profile in  
865 Human Placental Explants. *Front Immunol.* 2020;11:2864.
- 866 65. Louten J, Beach M, Palermino K, Weeks M, Holenstein G. MicroRNAs expressed  
867 during viral infection: Biomarker potential and therapeutic considerations. Vol. 10,  
868 Biomarker Insights. 2016.
- 869 66. Biswas S, Chen E, Haleyrugirisetty M, Lee S, Hewlett I, Devadas K. Comparison of  
870 miRNA expression profiles between HIV-1 and HIV-2 infected monocyte-derived  
871 macrophages (MDMs) and peripheral blood mononuclear cells (PBMCs). *Int J Mol*  
872 *Sci.* 2020;21(18).
- 873 67. Tamgue O, Gcanga L, Ozturk M, Whitehead L, Pillay S, Jacobs R, et al. Differential  
874 targeting of c-Maf, Bach-1, and Elmo-1 by microRNA-143 and microRNA-365  
875 promotes the intracellular growth of mycobacterium tuberculosis in alternatively IL-  
876 4/IL-13 activated macrophages. *Front Immunol.* 2019;10(MAR).
- 877 68. Tambyah PA, Ching CS, Sepramaniam S, Ali JM, Armugam A, Jeyaseelan K.  
878 microRNA expression in blood of dengue patients. *Ann Clin Biochem.* 2015;53(4).
- 879 69. Budak F, Bal SH, Tezcan G, Akalin H, Goral G, Oral HB. Altered Expressions of miR-  
880 1238-3p, miR-494, miR-6069, and miR-139-3p in the Formation of Chronic  
881 Brucellosis. *J Immunol Res.* 2016;2016.
- 882 70. Bai L, Wang H, Wang AH, Zhang LY, Bai J. MicroRNA-532 and microRNA-3064  
883 inhibit cell proliferation and invasion by acting as direct regulators of human  
884 telomerase reverse transcriptase in ovarian cancer. *PLoS One.* 2017;12(3).
- 885 71. Kan XQ, Li YB, He B, Cheng SF, Wei YJ, Sun J. Mir-1294 acts as a tumor inhibitor in  
886 cervical cancer by regulating flot1 expression. *J Biol Regul Homeost Agents.*  
887 2020;34(2).
- 888 72. Zhang M, Wang F, Zhang X. miRNA-627 inhibits cell proliferation and cell migration,  
889 promotes cell apoptosis in prostate cancer cells through upregulating MAP3K1,  
890 PTPRK and SRA1. *Int J Clin Exp Pathol.* 2018;11(1):255.

- 891 73. Wang Y, Zhang S, Bao H, Mu S, Zhang B, Ma H, et al. MicroRNA-365 promotes lung  
892 carcinogenesis by downregulating the USP33/SLIT2/ROBO1 signalling pathway.  
893 *Cancer Cell Int.* 2018;18(1).
- 894 74. Nezu Y, Hagiwara K, Yamamoto Y, Fujiwara T, Matsuo K, Yoshida A, et al. MiR-  
895 135b, a key regulator of malignancy, is linked to poor prognosis in human myxoid  
896 liposarcoma. *Oncogene.* 2016;35(48).
- 897 75. Cao Z, Zhang G, Xie C, Zhou Y. Mir-34b regulates cervical cancer cell proliferation  
898 and apoptosis. *Artif Cells, Nanomedicine Biotechnol.* 2019;47(1).
- 899 76. Kharadi U, Kharadi UA, Parkarwar P, Khairnar S, Reddy S, Arur P. Oral Candidiasis  
900 Turns to Oral Cancer—A Rare Clinical Presentation. *Clin Oncol.* 2016;1:1126.
- 901 77. Bakri MM, Hussaini HM, Holmes A, Cannon RD, Rich AM. Revisiting the association  
902 between candidal infection and carcinoma, particularly oral squamous cell carcinoma. *J*  
903 *Oral Microbiol.* 2010;2(2010).
- 904 78. Williamson MK, Coombes N, Juszcak F, Athanasopoulos M, Khan MB, Eykyn TR, et  
905 al. Upregulation of glucose uptake and hexokinase activity of primary human CD4+ T  
906 cells in response to infection with HIV-1. *Viruses.* 2018;10(3).
- 907 79. Freeman BD, Machado FS, Tanowitz HB, Desruisseaux MS. Endothelin-1 and its role  
908 in the pathogenesis of infectious diseases. Vol. 118, *Life Sciences.* 2014.
- 909 80. Zambreg I, Assouline B, Housset C, Schiffer E. Overexpression of TGF- $\alpha$  and EGFR, a  
910 key event in liver carcinogenesis, is induced by hypoxia specifically in hepatocytes.  
911 *Gastroenterol Hepatol Endosc.* 2019;4(3).
- 912 81. Hawkins PT, Stephens LR. PI3K signalling in inflammation. Vol. 1851, *Biochimica et*  
913 *Biophysica Acta - Molecular and Cell Biology of Lipids.* 2015.
- 914 82. Zhu M, Yang H, Chen Z, Xia X, Deng Q, Shen Y. A cell-permeable peptide inhibitor  
915 of p55PIK signaling alleviates ocular inflammation in mouse models of uveitis. *Exp*  
916 *Eye Res.* 2020;199.
- 917 83. Lee HS, Woo SJ, Koh HW, Ka SO, Zhou L, Jang KY, et al. Regulation of apoptosis  
918 and inflammatory responses by insulin-like growth factor binding protein 3 in  
919 fibroblast-like synoviocytes and experimental animal models of rheumatoid arthritis.  
920 *Arthritis Rheumatol.* 2014;66(4).
- 921 84. Kim G-D, Ng HP, Chan ER, Mahabeleshwar GH. Kruppel-like factor 6 promotes  
922 macrophage inflammatory and hypoxia response. *FASEB J Off Publ Fed Am Soc Exp*  
923 *Biol.* 2020 Feb;34(2):3209–23.
- 924 85. Yasuoka H, Yamaguchi Y, Feghali-Bostwick CA. The pro-fibrotic factor IGFBP-5

- 925 induces lung fibroblast and mononuclear cell migration. *Am J Respir Cell Mol Biol*.  
926 2009;41(2).
- 927 86. Dongari-Bagtzoglou A, Kashleva H. *Candida albicans* triggers interleukin-8 secretion  
928 by oral epithelial cells. *Microb Pathog*. 2003 Apr;34(4):169–77.
- 929 87. Spohn R, Daruka L, Lázár V, Martins A, Vidovics F, Grézal G, et al. Integrated  
930 evolutionary analysis reveals antimicrobial peptides with limited resistance. *Nat*  
931 *Commun*. 2019;10(1).
- 932 88. Kim D, Langmead B, Salzberg SL. HISAT: A fast spliced aligner with low memory  
933 requirements. *Nat Methods*. 2015;
- 934 89. Love MI, Huber W, Anders S. Moderated estimation of fold change and dispersion for  
935 RNA-seq data with DESeq2. *Genome Biol*. 2014;
- 936 90. Friedländer MR, MacKowiak SD, Li N, Chen W, Rajewsky N. MiRDeep2 accurately  
937 identifies known and hundreds of novel microRNA genes in seven animal clades.  
938 *Nucleic Acids Res*. 2012;40(1).
- 939 91. Yu G, Wang L-G, Yan G-R, He Q-Y. DOSE: an R/Bioconductor package for disease  
940 ontology semantic and enrichment analysis. *Bioinformatics*. 2014 Oct 17;31(4):608–9.
- 941 92. Yu G, Wang LG, Han Y, He QY. ClusterProfiler: An R package for comparing  
942 biological themes among gene clusters. *Omi A J Integr Biol*. 2012;
- 943 93. Carlson M, Falcon S, Pages H, Li N. org. Hs. eg. db: Genome wide annotation for  
944 Human. R Packag version. 2013;3(1).
- 945 94. Krämer A, Green J, Pollard J, Tugendreich S. Causal analysis approaches in ingenuity  
946 pathway analysis. *Bioinformatics*. 2014 Feb 15;30(4):523–30.
- 947
